# Supplementary material for: Photodegradation of berberine hydrochloride at the interface of 1D–2D nanohybrid of nickel ferrite supported on reduced graphene oxide
Source: Royal Society of Chemistry journal article supplement (doi:10.1039/d4su00638k), 2024-12-16
Supplement: d4su00638k1.pdf [file d4su00638k1.pdf]

## Supporting Information

### Photodegradation of Berberine Hydrochloride at the Interface of 1D-2D Nanohybrid of Nickel Ferrite supported on Reduced Graphene Oxide

Sayanika Saikia<sup>a</sup>, Salma A. Khanam<sup>a</sup>, Priyanuj Kandali<sup>a</sup>, Ankur Kanti Guha<sup>b</sup>, Kusum K. Bania<sup>a\*</sup>

<sup>a</sup>*Department of Chemical Sciences, Tezpur University, Assam, India, 784028.*

<sup>b</sup>*Advanced Computational Chemistry Centre, Cotton University, Panbazar, Guwahati, Assam 781001, India.*

#### Corresponding Author

\*Email: [kusum@tezu.ernet.in](mailto:kusum@tezu.ernet.in) or [bania.kusum8@gmail.com](mailto:bania.kusum8@gmail.com)

ORCID

**Kusum K. Bania:** 0000-0001-6535-3913

| Sl No. | Title                                                                                                                                                 | Page No. |
|--------|-------------------------------------------------------------------------------------------------------------------------------------------------------|----------|
| 1      | Physical Measurements                                                                                                                                 | S3-S4    |
| 2      | Synthesis procedure of Fe <sub>2</sub> O <sub>3</sub> and NiO                                                                                         | S5       |
| 3      | FTIR spectra of NFNR, rGO and NFNR/rGO, <b>Fig. S1</b>                                                                                                | S6       |
| 4      | TGA spectra of NFNR, rGO and NFNR/rGO, <b>Fig. S2</b>                                                                                                 | S7       |
| 5      | N <sub>2</sub> adsorption-desorption isotherm of NFNR/rGO, <b>Fig. S3</b>                                                                             | S8       |
| 6      | Nyquist plot of NFNR, rGO and NFNR/rGO, <b>Fig. S4</b>                                                                                                | S9       |
| 7      | UV spectra and bar diagram of BH degradation for different prepared catalysts, <b>Fig. S5</b>                                                         | S10      |
| 8      | UV spectra and bar diagram of BH degradation with NFNR/rGO for light irradiation condition, <b>Fig. S6</b>                                            | S11      |
| 9      | Point of Zero Charge (pH <sub>PZC</sub> ) of NFNR/rGO, <b>Fig. S7</b>                                                                                 | S12      |
| 10     | Effect of initial pH of BH solution on photodegradation of BH, <b>Fig. S8</b>                                                                         | S13      |
| 11     | UV spectra and bar diagram of BH degradation for different BH solution concentration, <b>Fig. S9</b>                                                  | S14      |
| 12     | Kinetic analysis of BH degradation, <b>Fig. S10</b>                                                                                                   | S15      |
| 13     | Comparison of BH degradation efficiency of NFNR/rGO composite with physical mixture of NFNR and rGO, <b>Fig. S11</b>                                  | S16      |
| 14     | Percentage mineralization efficiency of BH, <b>Fig. S12</b>                                                                                           | S17      |
| 15     | Stability test of NFNR/rGO under strong acidic condition (pH=2), <b>Fig. S13</b>                                                                      | S18      |
| 16     | BH degradation with various scavenging agents, <b>Fig. S14</b>                                                                                        | S19      |
| 17     | ESR analysis, <b>Fig. S15</b>                                                                                                                         | S20      |
| 18     | PXRD pattern of the other synthesized catalysts: NFNR-1/rGO, NFNR-2/rGO, NFNR/CTW, Fe <sub>2</sub> O <sub>3</sub> and NiO, <b>Fig. S16</b>            | S21      |
| 19     | Raman spectra of the other synthesized catalysts: NFNR-1/rGO, NFNR-2/rGO, NFNR/CTW, Fe <sub>2</sub> O <sub>3</sub> and NiO, <b>Fig. S17, Table S1</b> | S22      |
| 20     | FTIR spectra of the other synthesized catalysts: NFNR-1/rGO, NFNR-2/rGO, NFNR/CTW, Fe <sub>2</sub> O <sub>3</sub> and NiO, <b>Fig. S18, Table S2</b>  | S23      |
| 21     | TGA pattern of the other synthesized catalysts: NFNR-1/rGO, NFNR-2/rGO and NFNR/CTW, <b>Fig. S19</b>                                                  | S24      |
| 22     | SEM-EDX pattern of the other synthesized catalysts: NFNR-1/rGO, NFNR-2/rGO and NFNR/CTW, <b>Fig. S20</b>                                              | S25      |
| 23     | Photocatalytic degradation of BH with other synthesized catalyst under optimized conditions, <b>Fig. S21</b>                                          | S26      |
| 24     | Comparative study of the efficiency of Nickel ferrite photocatalysts for organic pollutants degradation, <b>Table S3</b>                              | S27      |
|        | References                                                                                                                                            | S28- S29 |

## 1. Physical measurement

Physical measurements for different characterizations and analyses were done by the following techniques. The powder-X-ray diffraction (XRD) patterns were recorded in an instrument from BRUKER AXS, D8 FOCUS in the  $2\theta$  value range of  $5-80^\circ$ . Raman spectroscopy was carried out on RENISHAW BASIS SERIES WITH 514 LASERS (software: WIRE 3.4). The Diffuse Reflectance Spectra (DRS) were recorded employing a Hitachi U-3400 spectrophotometer. The infrared spectra had been recorded on a Perkin- Elmer 2000 FTIR spectrometer within the range of  $450-4000\text{ cm}^{-1}$ . The spectra of the solid samples were recorded as KBr pellets through blending the samples with KBr. Thermogravimetric analysis was performed on simultaneous TG-DTA thermo analyzer, Mettler Toledo, under air atmosphere. Brunauer- Emmett-Teller (BET) surface areas were obtained by means of  $\text{N}_2$  sorption data measured at  $77\text{ K}$  by a volumetric adsorption setup (Autosor IQ-MP Make: Quantachrome, USA). Scanning Electron Microscope (SEM) images along with the X-Ray and Elemental mapping analyses were done ZEISS, SIGMA instrument manufactured by Carl Zeiss Microscopy. The Transmission Electron Microscope (TEM) images along with energy dispersive X-ray spectroscopy (EDX) analysis was performed on a JEM-2100 Plus Electron Microscope (JEOL). SEM-EDX analysis was done with JSM 6390LV, JEOL SOFTWARE (WINDOW BASED). Inductively Coupled Plasma Optical Emission Spectrophotometer (ICP-OES) analysis was performed in PERKIN ELMER, USA, Model: AVIO 220 MAX. The cyclic voltammetry (CV) and Mott Schottky (MS) analysis studies were performed in a CHI-600E meter from CH Instruments using the glassy carbon electrode (GCE) and Pt as a working electrode, Ag/AgCl as reference electrode and Pt wire as a counter electrode, respectively. PL spectra were recorded in FL3C-KIT\_2031C-4819-FL instrument. The photoelectrochemical measurements of the samples

was carried out in a three-electrode working set up consisting of WE (Substrates), RE (Ag/AgCl) and CE (Pt wire), 1 M KOH (model- CHI1120B). The X-ray photoelectron (XPS) spectra were obtained from a XPS KRATOS (ESCA AXIS 165) spectrometer having Mg K $\alpha$  (1253.6 eV) as radiation source. Before transferring to the analysis chamber, the oven-dried sample was crushed into small pieces, sprinkled on a graphite sheet (double rod), and attached to a normal sample holder. The material was degassed overnight in a vacuum oven. The binding energy value was modified with reference to the 284.8 eV C 1s peak and the peak was deconvoluted using Origin software. The UV-Vis experiments were carried out in Shimadzu, UV-2550 spectrophotometer. 500 mL of quartz glass chamber with a Mercury lamp, light source was surrounded by a double jacketed quartz immersion with an inlet and outlet of water circulation to ensure a safe temperature for the photocatalytic reaction. The mass of the intermediate molecules was determined by Low-resolution mass spectra (LRMS). Mass spectra (MS) of the samples were recorded in Thermo Scientific Q-Exactive, Accela 1250 pump. Electron spin resonance (ESR) spectroscopy was recorded in JEOL, Japan (JES - FA200 ESR Spectrometer with X and Q band).

## **2. Synthesis procedure of Fe<sub>2</sub>O<sub>3</sub> and NiO.**

### **I. Synthesis of Fe<sub>2</sub>O<sub>3</sub>**

For the synthesis of Fe<sub>2</sub>O<sub>3</sub>, 0.01 M (0.135 g in 50 mL water) of iron (III) chloride solution was stirred at 60 °C. 50 mL of 0.1 M of sodium hydroxide (NaOH) solution was added dropwise to the above solution and refluxed for another 24 h. Resultant material was filtered, washed properly and then calcined at 400 °C for 5 h.

### **II. Synthesis of NiO**

NiO was synthesized using simple precipitation method. A 0.1 M solution of NiCl<sub>2</sub>·6H<sub>2</sub>O was treated with a 0.1 M solution of NaOH to get a precipitate of Ni(OH)<sub>2</sub>. The precipitate was filtered and washed with distilled water to get rid of unreacted components. Then the material was calcined at 400 °C for 3 h to get NiO.

### 3. FTIR spectra of NFNR, rGO and NFNR/rGO

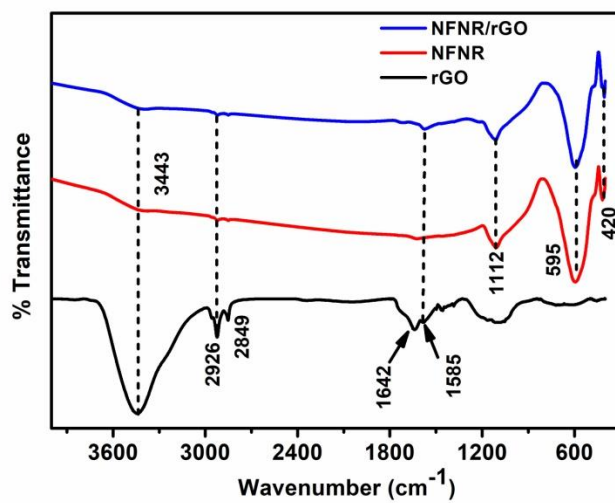

**Fig. S1** FTIR spectra of rGO (black), NFNR (red) and NFNR/rGO (blue).

#### 4. TGA spectra of NFNR, rGO and NFNR/rGO

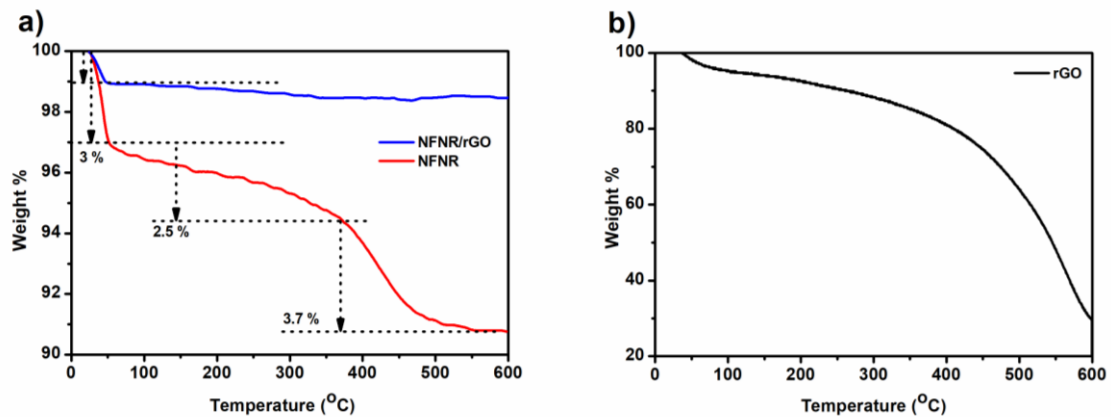

**Fig. S2** TGA spectra of a) NFNR (red line) and NFNR/rGO (blue line) and b) rGO (black line).

## 5. N<sub>2</sub> adsorption-desorption isotherm of NFNR/rGO

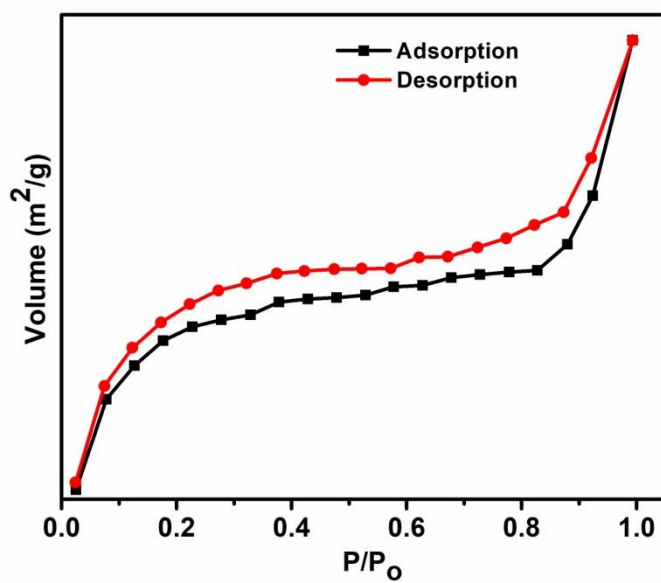

**Fig. S3** N<sub>2</sub> adsorption-desorption isotherm of NFNR/rGO.



## 6. Nyquist plot of NFNR, rGO and NFNR/rGO

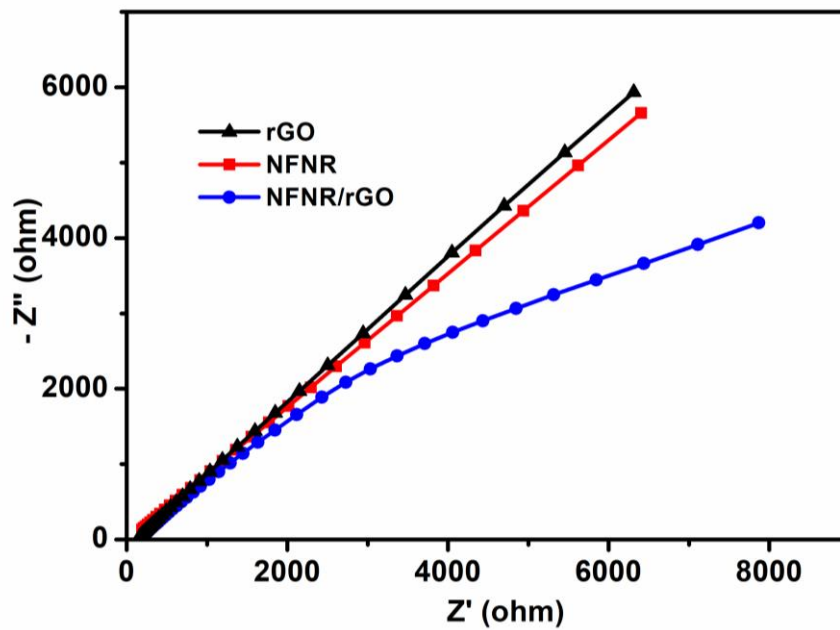

**Fig. S4** Nyquist plot of NFNR (red line), NFNR/rGO (blue line) and rGO (black line).

## 7. UV spectra and bar diagram of BH degradation for different prepared catalysts.

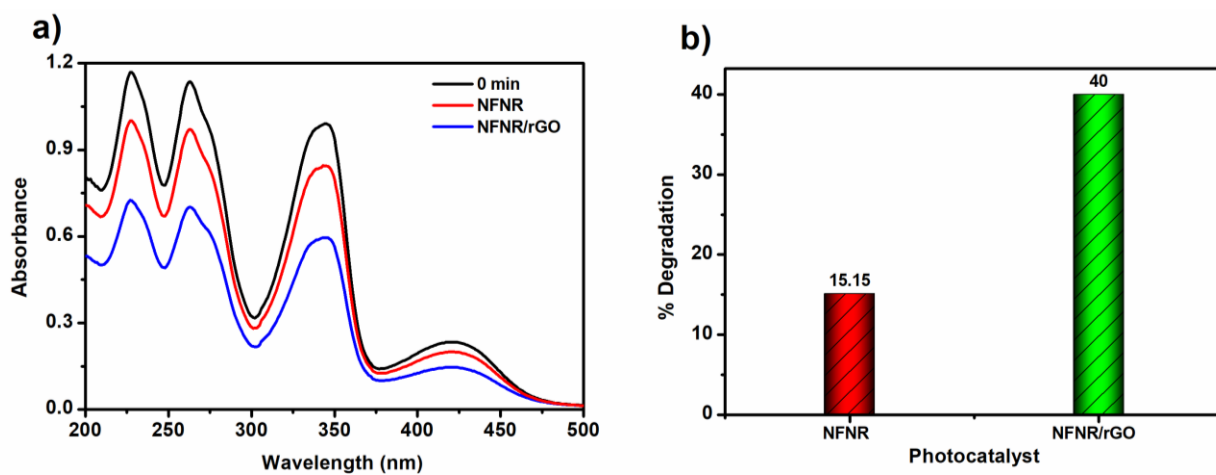

**Fig. S5** a) UV spectra and b) bar diagram of BH degradation with NFNR and NFNR/rGO catalyst (2 mg) with 90 min UV-light irradiation at pH=2 (20 ml of 50 ppm BH solution).

8. UV spectra and bar diagram of BH degradation with NFNR/rGO for light irradiation condition.

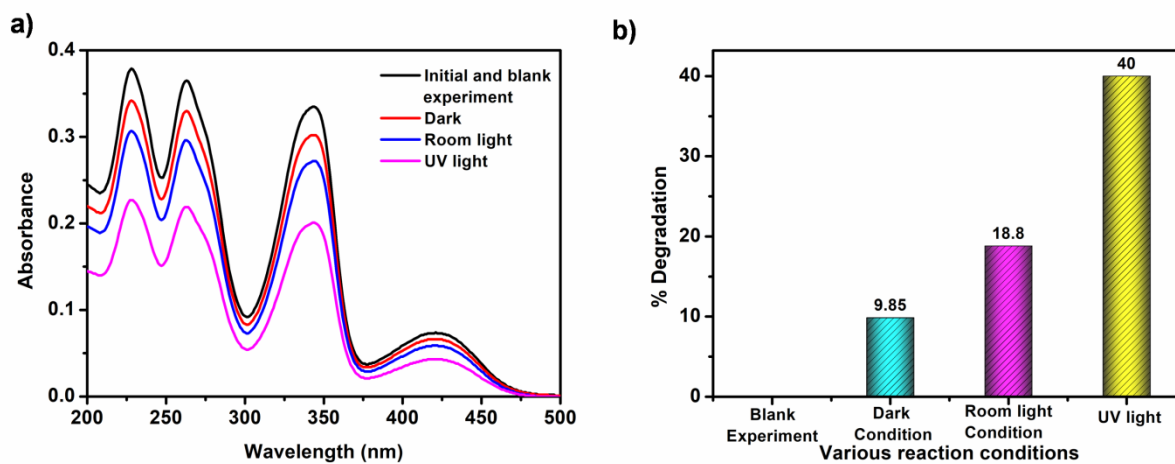

**Fig. S6** a) UV spectra and b) bar diagram for comparison of BH degradation under dark, room light and UV light irradiation with NFNR/rGO (2 mg) catalyst, 90 min irradiation and pH=2.

## 9. Point of Zero Charge ( $\text{pH}_{\text{PZC}}$ ) of NFNR/rGO

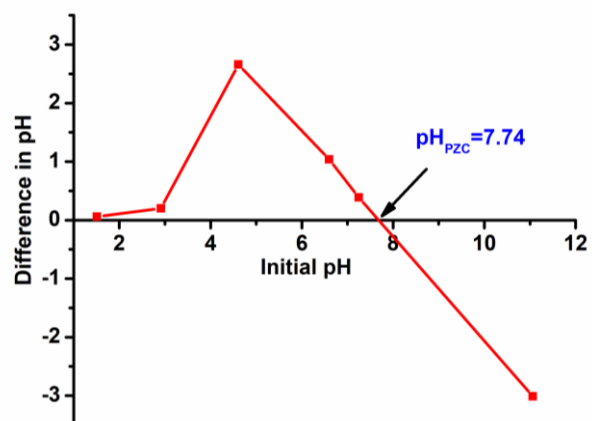

**Fig. S7** Point of Zero Charge ( $\text{pH}_{\text{PZC}}$ ) of NFNR/rGO.

## 10. Effect of initial pH of BH solution on photodegradation of BH

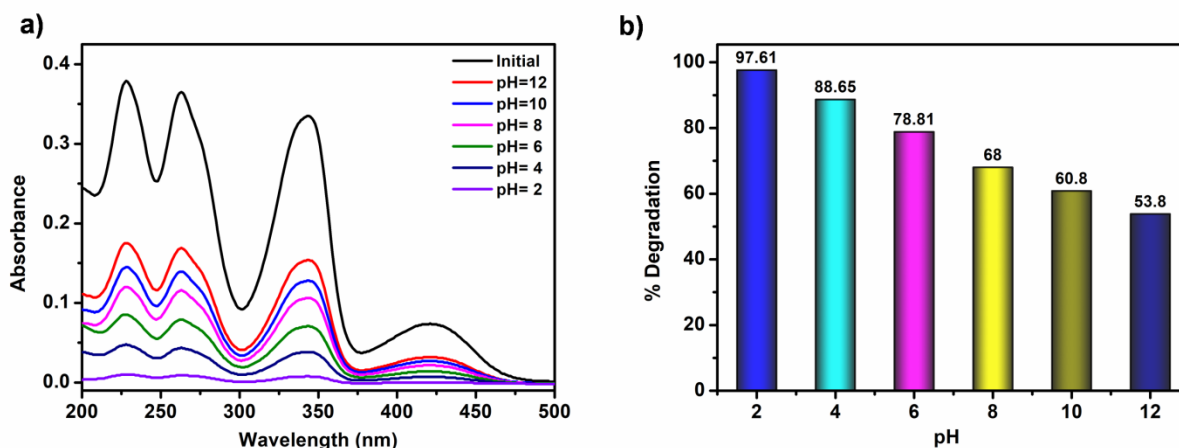

**Fig. S8** a) UV spectra and b) bar diagram showing the effect of pH on BH degradation (20 ml of 50 ppm BH solution, 12 mg NFNR/rGO, and 60 min of UV light irradiation).

## 11. UV spectra and bar diagram of BH degradation for different BH solution concentration

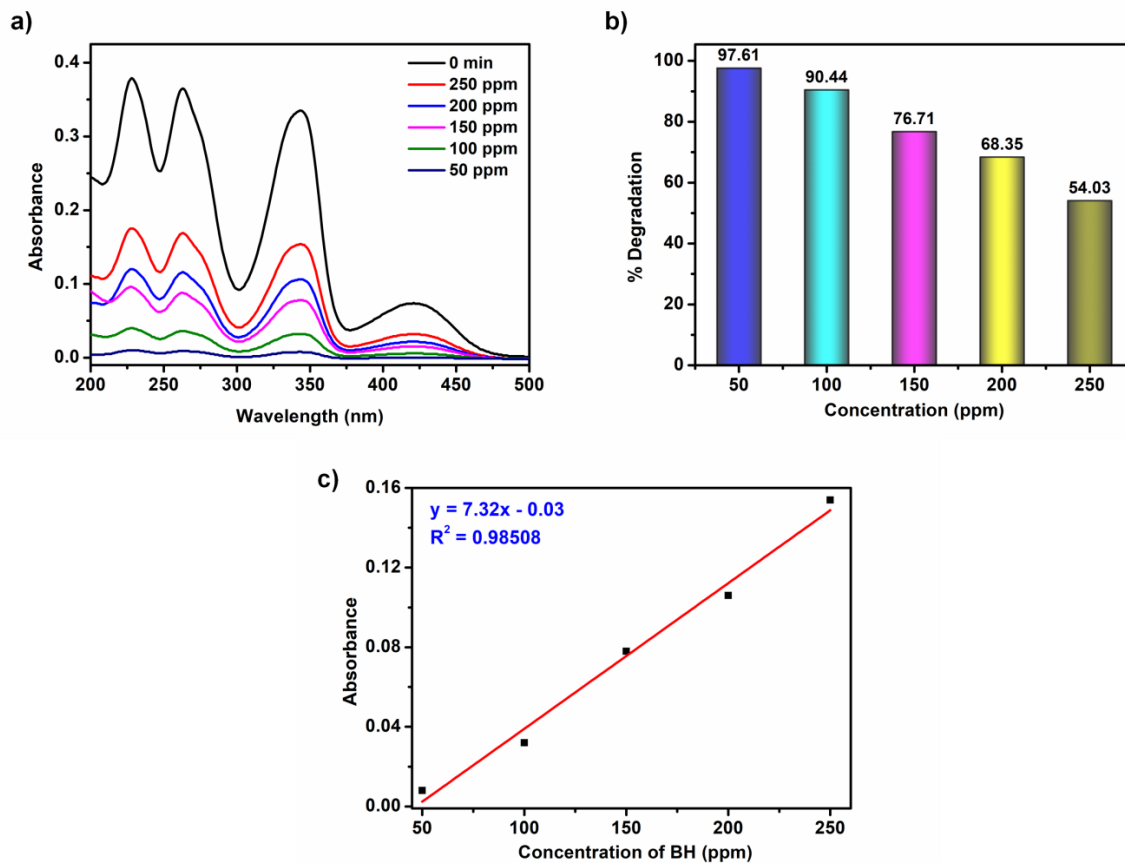

**Fig. S9** a) UV spectra, b) bar diagram of BH degradation for different initial concentration of BH solution (12 mg catalyst, 60 min of irradiation time and pH=2) and c) linear relationship of absorbance vs. concentration of BH.

## 12. Kinetic analysis of BH degradation

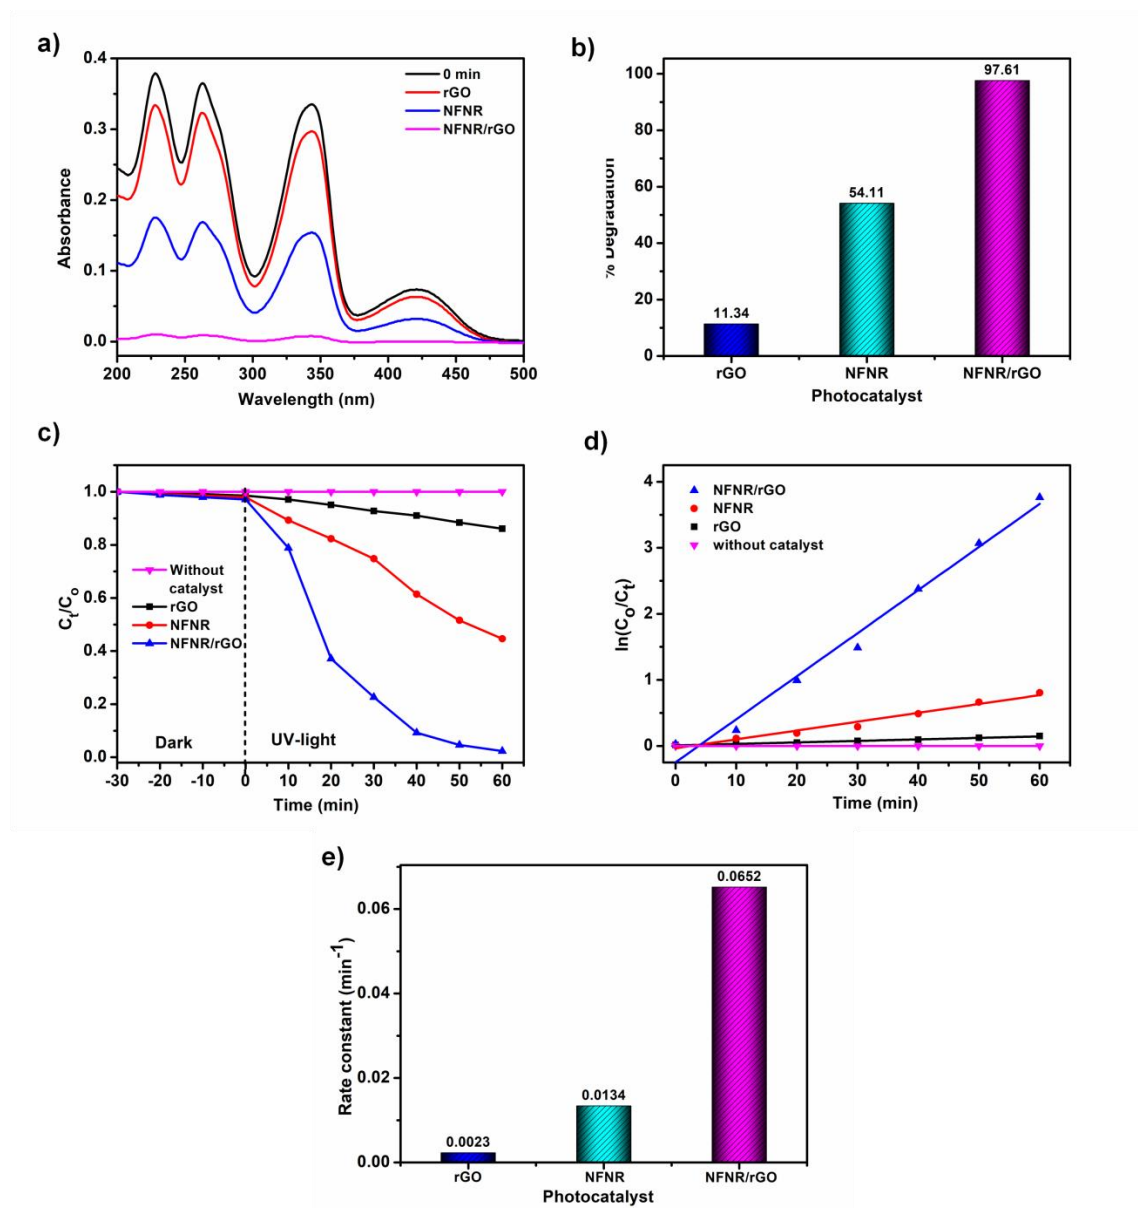

**Fig. S10** a) UV spectra, b) bar diagram showing the degradation of BH with NFNR, rGO and NFNR/rGO (12 mg, 60 min irradiation and pH=2), c) time dependent degradation curve, d) corresponding photodegradation kinetic curves and e) rate constant of BH degradation over as-prepared samples.

### 13. Comparison of BH degradation efficiency of NFNR/rGO composite with physical mixture of NFNR and rGO

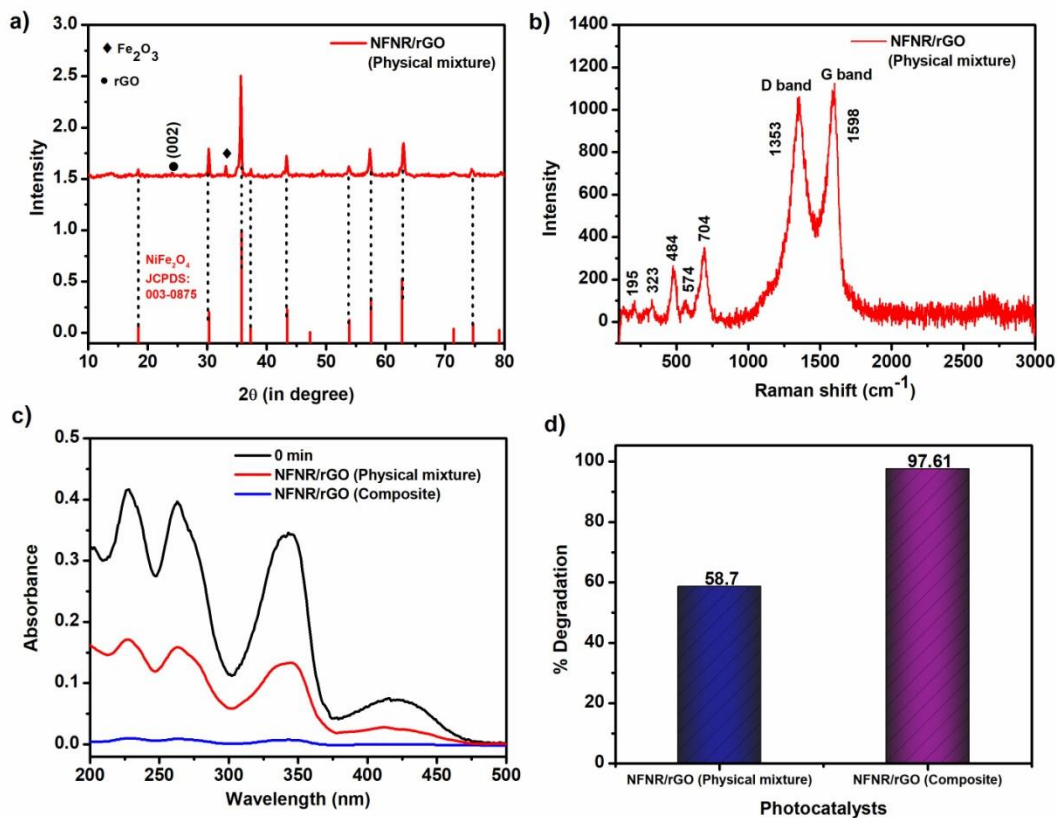

**Fig. S11** a) XRD and b) Raman analysis, c) UV spectra and d) bar diagram showing the comparison of BH degradation efficiency of NFNR/rGO composite with physical mixture of NFNR and rGO.



#### 14. Percentage mineralization efficiency of BH

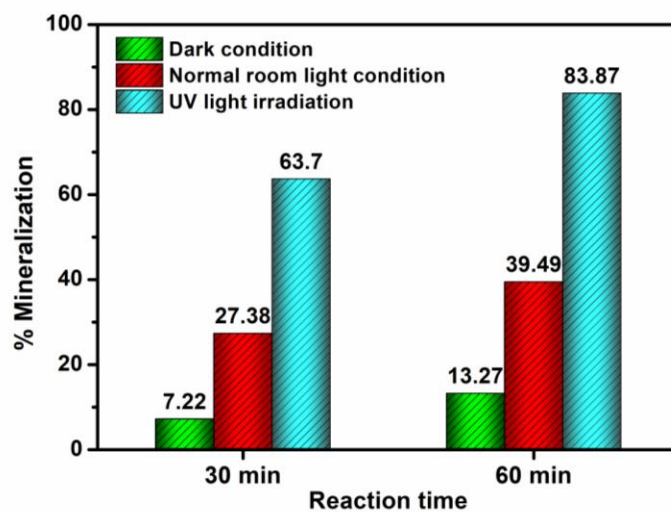

**Fig. S12** Percentage of mineralization efficiency of BH using NFNR/rGO (12 mg) under dark, room light and UV light irradiation at different reaction time.

## 15. Stability test of NFNR/rGO under strong acidic condition (pH=2)

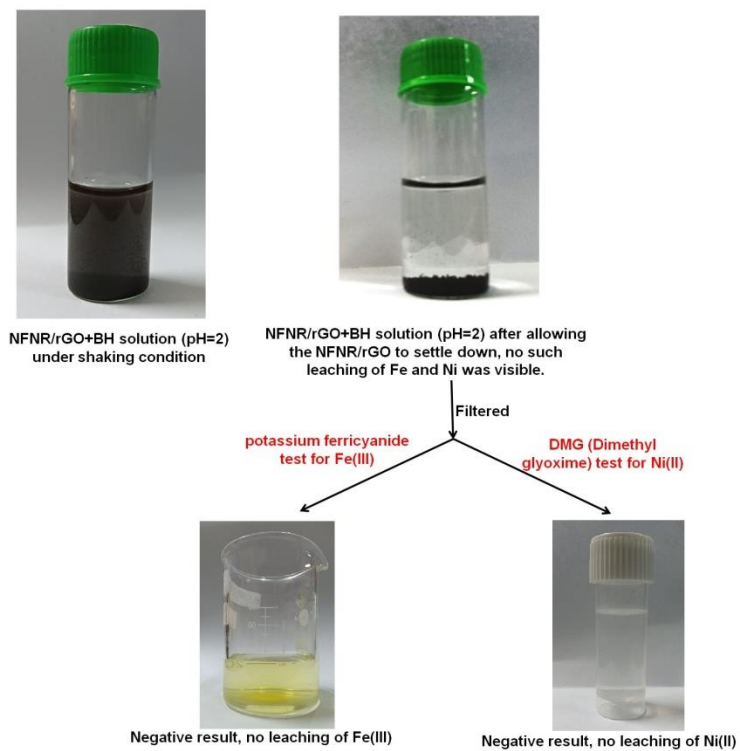

**Fig. S13** Stability test of NFNR/rGO under strong acidic condition (pH=2)

## 16. BH degradation with various scavenging agents

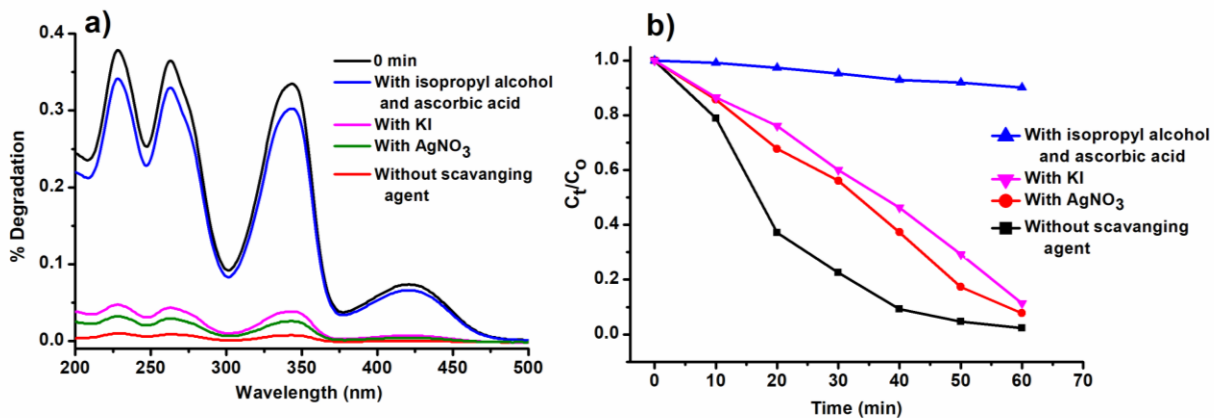

**Fig. S14** a) UV graph and b) time dependent degradation curve for comparing the photocatalytic activity of NFNR/rGO for BH degradation (12 mg catalyst, 60 min of irradiation time and pH=2) with the addition of scavengers or without scavengers under optimized reaction conditions.

## 17. ESR analysis

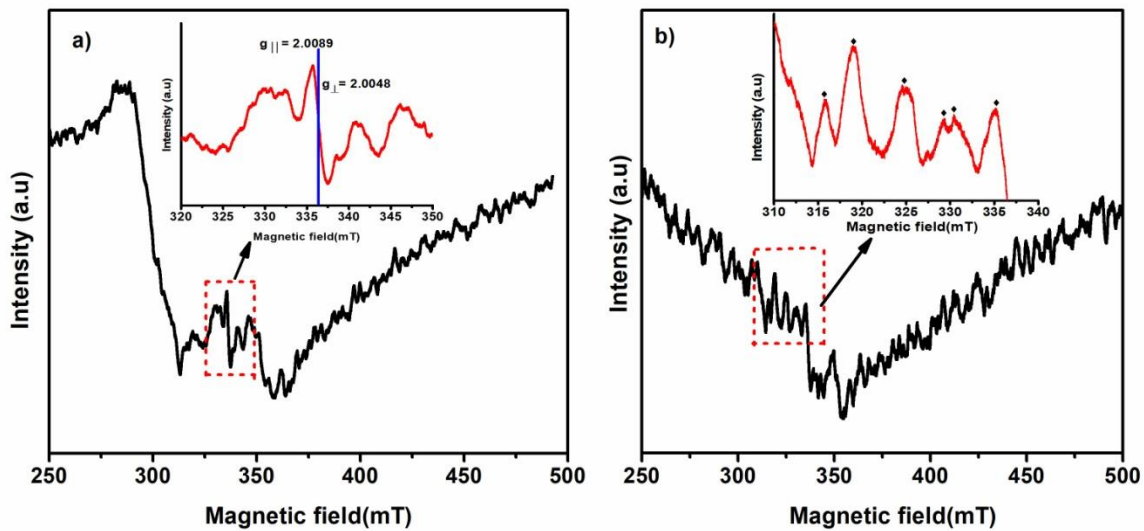

Fig. S15 ESR analysis a) before adding DMPO and b) after adding DMPO.

18. PXRD pattern of the other synthesized catalysts: NFNR-1/rGO, NFNR-2/rGO, NFNR/CTW, Fe<sub>2</sub>O<sub>3</sub> and NiO

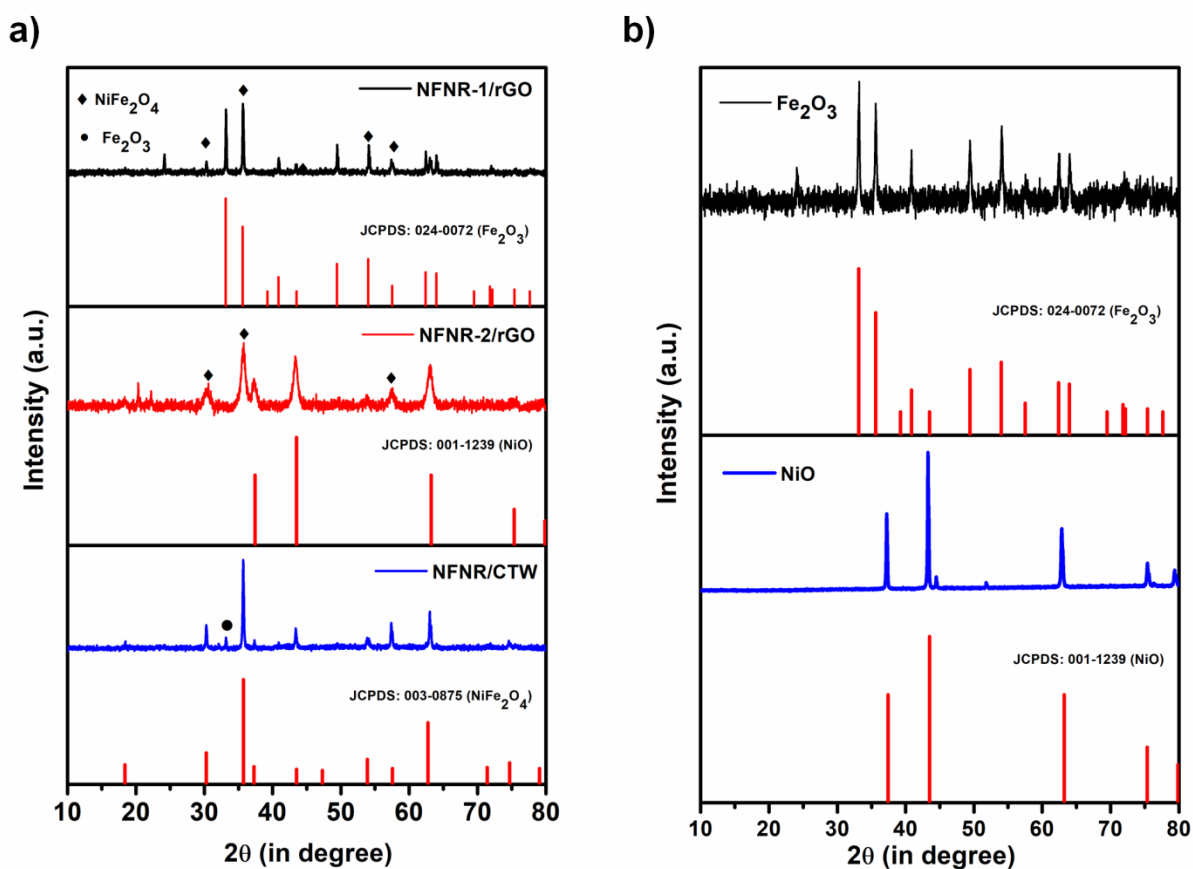

**Fig. S16** PXRD pattern of synthesized catalysts: a) NFNR-1/rGO, NFNR-2/rGO, NFNR/CTW and b) Fe<sub>2</sub>O<sub>3</sub>, NiO.

**19. Raman spectra of the other synthesized catalysts: NFNR-1/rGO, NFNR-2/rGO, NFNR/CTW, Fe<sub>2</sub>O<sub>3</sub> and NiO**

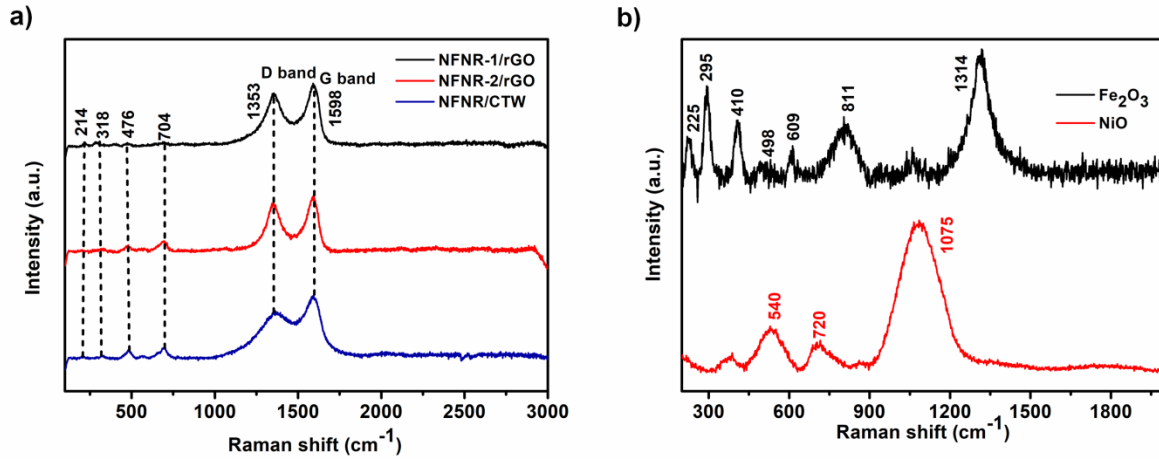

**Fig. S17** Raman spectra of synthesized catalysts: a) NFNR-1/rGO, NFNR-2/rGO, NFNR/CTW and b) Fe<sub>2</sub>O<sub>3</sub>, NiO.

**Table S1** Raman analysis of synthesized catalysts

| Sl No.             | Materials  | Raman shift (cm <sup>-1</sup> ) | Assignment                      | References               |
|--------------------|------------|---------------------------------|---------------------------------|--------------------------|
| 1                  | NFNR-1/rGO | 214, 476                        | T <sub>2g</sub> mode            | 1                        |
|                    | NFNR-2/rGO | 318                             | E <sub>g</sub> mode             | 1                        |
|                    | NFNR/CTW   | 704                             | A <sub>1g</sub> mode            | 2                        |
|                    |            | 1353                            | D-band                          | 3                        |
|                    |            | 1598                            | G-band                          | 3                        |
|                    | 2          | Fe <sub>2</sub> O <sub>3</sub>  | 225, 498                        | A <sub>1g</sub> symmetry |
| 295, 410, 609, 811 |            |                                 | E <sub>g</sub> symmetry         | 5                        |
| 1360               |            |                                 | Attributed to typical hematite  |                          |
|                    |            |                                 |                                 |                          |
| 3                  | NiO        | 540                             | one-phonon (1P) TO and LO modes | 6                        |
|                    |            | 720                             | two-phonon (2P) 2TO modes       |                          |
|                    |            | 1075                            | 2LO modes                       |                          |

20. FTIR spectra of the other synthesized catalysts: NFNR-1/rGO, NFNR-2/rGO, NFNR/CTW, Fe<sub>2</sub>O<sub>3</sub> and NiO

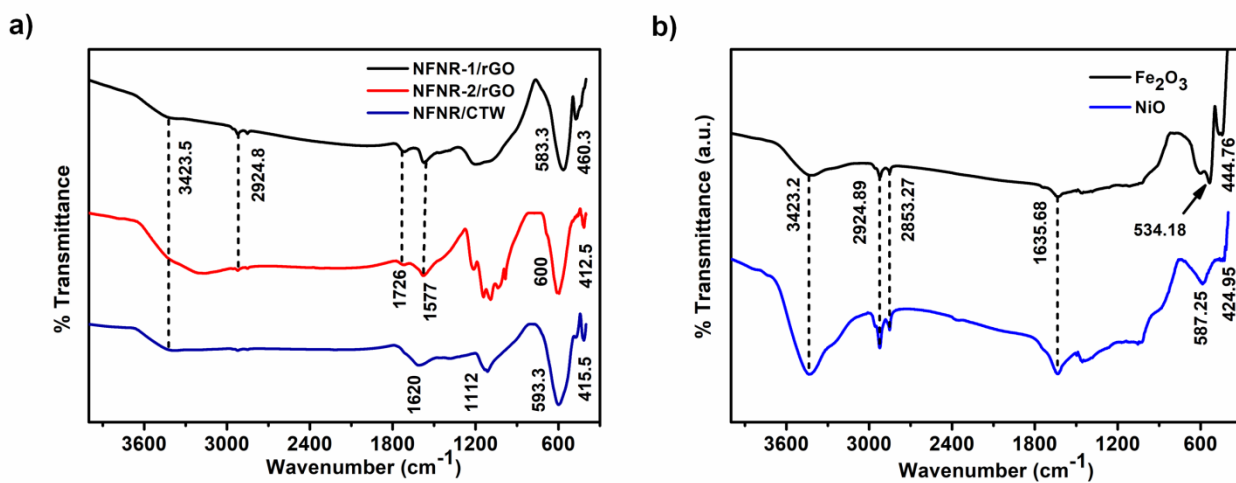

**Fig. S18** FTIR spectra of synthesized catalysts: a) NFNR-1/rGO, NFNR-2/rGO, NFNR/CTW and b) Fe<sub>2</sub>O<sub>3</sub>, NiO.

**Table S2** FTIR analysis of synthesized catalysts.

| Sl no. | Materials                      | Wavenumber (cm <sup>-1</sup> ) | Assignment                   | Reference |
|--------|--------------------------------|--------------------------------|------------------------------|-----------|
| 1      | NFNR-1/rGO                     | 460.3                          | V <sub>Fe-O</sub>            | 7         |
|        |                                | 583.3                          | V <sub>Ni-O</sub>            |           |
|        |                                | 1577, 1726                     | -COOH, -C-OH, -C-O vibration | 8         |
|        |                                | 2924.8                         | V <sub>s(C-H)</sub>          | 9         |
|        |                                | 3424.8                         | VO-H                         | 10        |
| 2      | NFNR-2/rGO                     | 412.5                          | V <sub>Fe-O</sub>            | 7         |
|        |                                | 600                            | V <sub>Ni-O</sub>            |           |
|        |                                | 1577, 1726                     | -COOH, -C-OH, -C-O vibration | 8         |
|        |                                | 2924.8                         | V <sub>s(C-H)</sub>          | 9         |
|        |                                | 3424.8                         | VO-H                         | 10        |
| 3      | NFNR/CTW                       | 415.5                          | V <sub>Fe-O</sub>            | 7         |
|        |                                | 593.3                          | V <sub>Ni-O</sub>            |           |
|        |                                | 1112                           | VC-O                         |           |
|        |                                | 1620                           |                              |           |
|        |                                | 3424.8                         | VO-H                         |           |
|        |                                | 534.18                         | V <sub>Fe-O</sub>            | 11        |
| 4      | Fe <sub>2</sub> O <sub>3</sub> | 1635.68, 3423.2                | Surface hydration            |           |
|        |                                | 2924.89, 2853.27               | V <sub>as(C-H)</sub>         |           |
|        |                                |                                |                              |           |
| 5      | NiO                            | 424.95                         | V <sub>Ni-O</sub>            | 6         |

21. TGA pattern of the other synthesized catalysts: NFNR-1/rGO, NFNR-2/rGO and NFNR/CTW

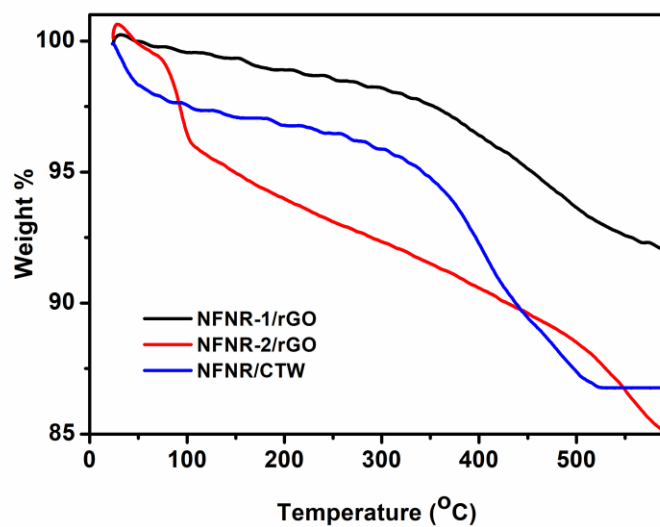

Fig. S19 TGA spectra of the NFNR-1/rGO, NFNR-2/rGO and NFNR/CTW.



22. SEM-EDX pattern of the other synthesized catalysts: NFNR-1/rGO, NFNR-2/rGO and NFNR/CTW

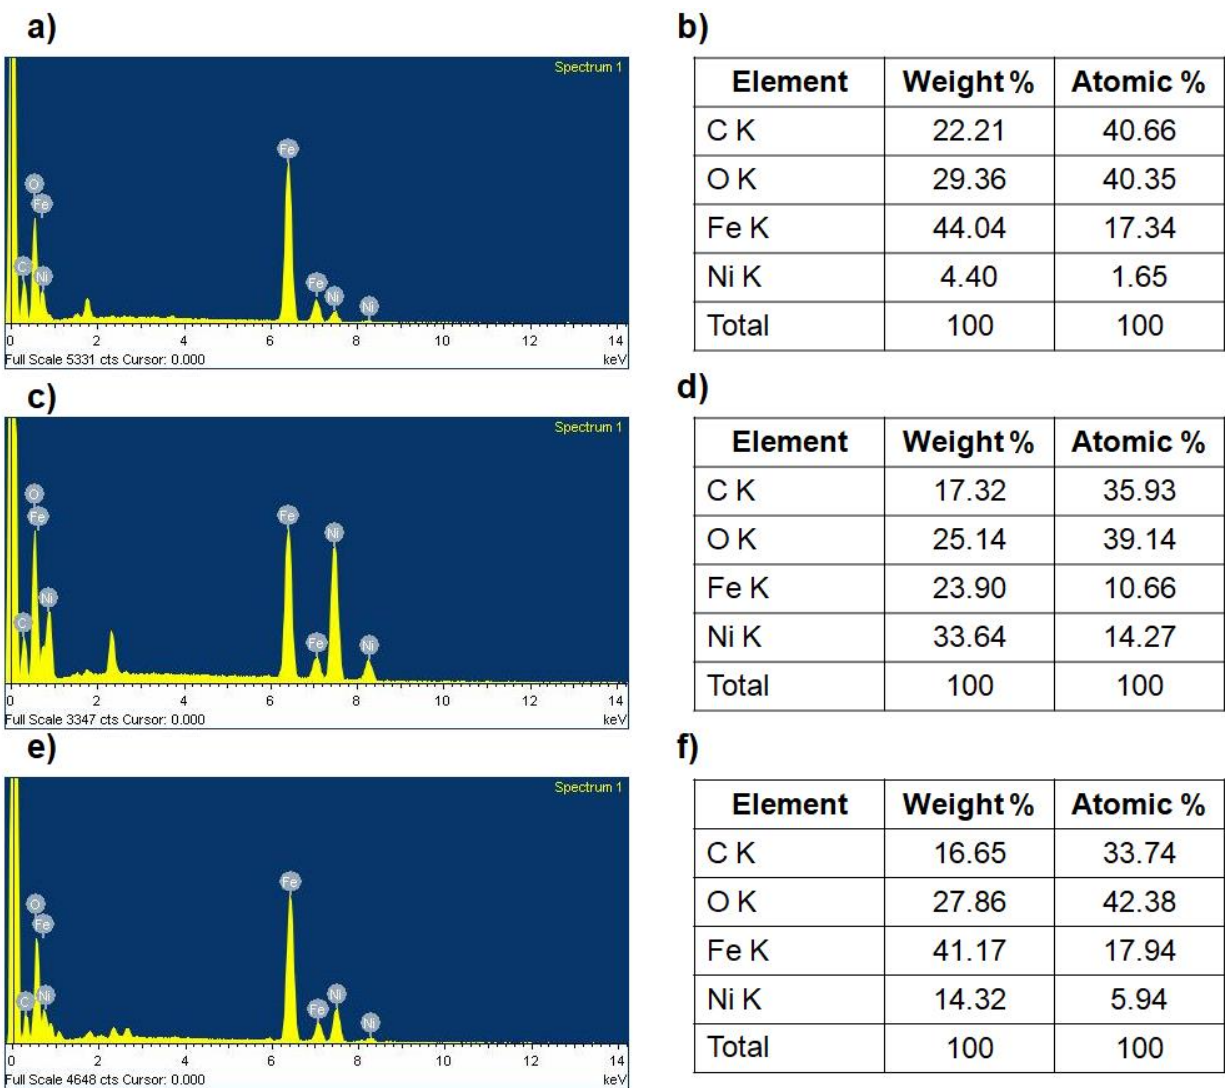

Fig. S20 SEM-EDX pattern of a), b) NFNR-1/rGO, c), d) NFNR-2/rGO and e), f) NFNR/CTW.

23. Photocatalytic degradation of BH with other synthesized catalyst under optimized conditions.

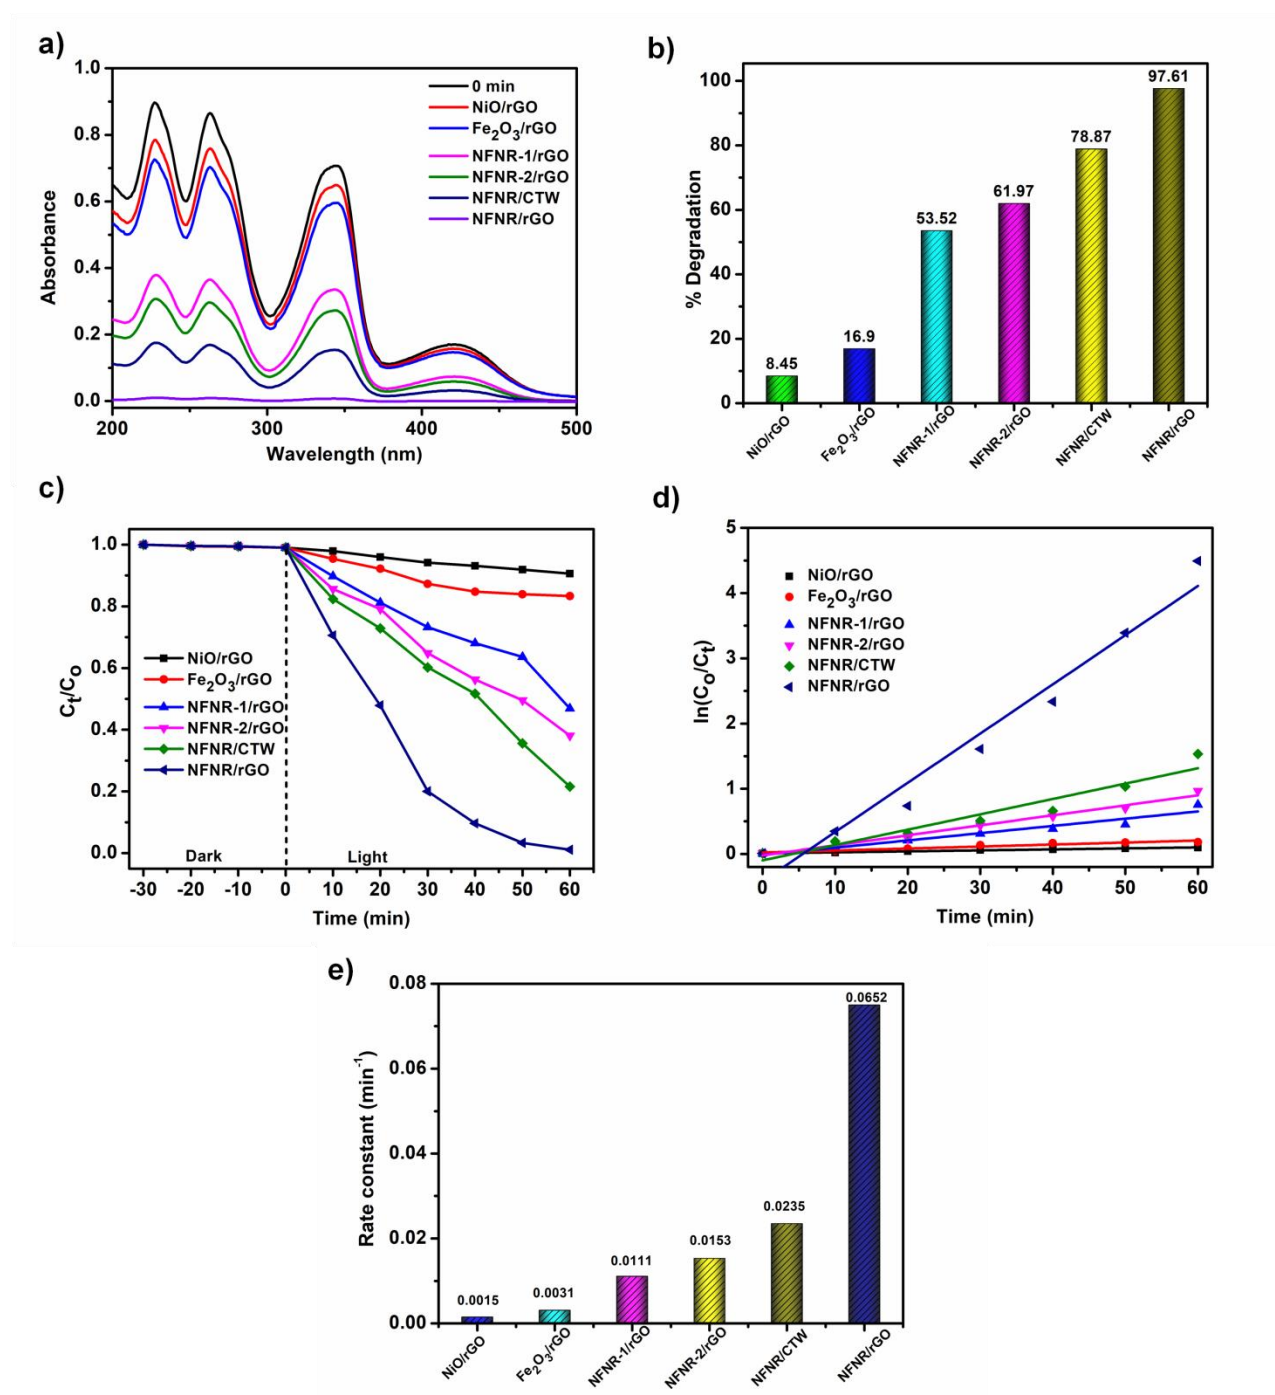

**Fig. S21** a) Absorption spectra and b) % degradation of the BH solution over different catalyst under UV-light irradiation; c) photocatalytic degradation of BH solution under UV-light irradiation, d) corresponding photodegradation kinetic curves, e) rate constant of BH removal over as-prepared catalysts. (20 ml of 50 ppm BH solution, 12 mg catalyst, pH=2 and 60 min irradiation time).

## 24.

**Table S3** Comparative study of the efficiency of Nickel ferrite photocatalysts for organic pollutants degradation.

| Entry No | Photocatalysts <sup>a</sup>                                          | Pollutants                                     | Efficiency              | Light source    | Time             | Ref               |
|----------|----------------------------------------------------------------------|------------------------------------------------|-------------------------|-----------------|------------------|-------------------|
| 1        | Nickel ferrite-carbon nanoflakes (NiFe@NCF) nanocomposite            | LEV<br>CIP                                     | 99.91%<br>98.86%        | Visible light   | 50 min<br>70 min | 12                |
| 2        | NiFe <sub>2</sub> O <sub>4</sub> -Ag-ZnO                             | Methylene Blue (MB) dye                        | 98 %                    | UV-light        | 60 min           | 13                |
| 3        | NiFe <sub>2</sub> O <sub>4</sub>                                     | MB                                             | ~98.5 %                 | UV/Vis light    | 70 min           | 14                |
| 4        | gC <sub>3</sub> N <sub>4</sub> /NiFe <sub>2</sub> O <sub>4</sub> /Ag | Tetracycline                                   | 92.1 %                  | Visible light   | 120 min          | 15                |
| 5        | nickel ferrite/zinc oxide (NiFe <sub>2</sub> O <sub>4</sub> /ZnO)    | Methyl orange<br>Methyl blue<br>Crystal violet | 49.2%<br>44.4%<br>41.3% | Solar light     | 40 min           | 16                |
| 6        | NiFe <sub>2</sub> O <sub>4</sub>                                     | MG dye<br>Pharmaceutical SSX                   | 99%<br>74%              |                 | 120 min          | 17                |
| 7        | Nickel ferrite/chitosan/bismuth(III) oxyiodide                       | Metronidazole                                  | 100%                    | Sunlight        | 200 min          | 18                |
| 8        | MWCNT–CuNiFe <sub>2</sub> O <sub>4</sub>                             | Acid blue 113 (AB113) dye                      | 100 %                   | UV light        | 30 min           | 19                |
| 9        | Ni@NiFe <sub>2</sub> O <sub>4</sub> /ZnO                             | β-lactam antibiotic cefadroxil                 | 95 %                    | Solar light     | 60 min           | 20                |
| 10       | Cd-Gd-doped nickel spinel ferrite/rGO                                | Methylene Blue<br>Rhodamine-B                  | 92.27%<br>53.18%        | Visible light   | 120 min          | 21                |
| 11       | <b>NiFe<sub>2</sub>O<sub>4</sub>/rGO (NFNR/rGO)</b>                  | <b>Berberine hydrochloride (BH)</b>            | <b>97.61 %</b>          | <b>UV-light</b> | <b>60 min</b>    | <b>This study</b> |

<sup>a</sup> NiFe<sub>2</sub>O<sub>4</sub> based reported photocatalysts considered here for comparison.

## References

---

- 1 J.L. Ortiz-Quiñonez, U. Pal and M.S. Villanueva, *ACS Omega*, 2018, **3**, 14986-15001.
- 2 S. Mishra, P. Kumar and S.K. Samanta, *Ind. Eng. Chem. Res.*, 2020, **59**, 15839-15847.
- 3 K.K.H. De Silva, P. Viswanath, V.K. Rao, S. Suzuki and M. Yoshimura, *J. Phys. Chem. C*, 2021, **125**, 7791-7798.
- 4 M. Qayoom, K.A. Shah, A.H. Pandit, A. Firdous and G.N. Dar, *J. Electroceram.*, 2020, **45**, 7-14.
- 5 H. Mansour, H. Letifi, R. S. Bargougui, De Almeida-Didry, B. Negulescu, C. Autret-Lambert, A. Gadri and S. Ammar, *Appl. Phys. A*, 2017, **123**, 1-10.
- 6 J. Qiu, T.H. Nguyen, S. Kim, Y.J. Lee, M.T. Song, W.J. Huang, X.B. Chen, T.M.H. Nguyen and I.S. Yang, *Spectrochim. Acta, Part A*, 2022, **280**, 121498.
- 7 M. Shabani, E. Saebnoori, S.A. Hassanzadeh-Tabrizi and H.R. Bakhsheshi-Rad, *J. Mater. Sci.: Mater. Electron.*, 2021, **32**, 10424-10442.
- 8 Z. Iqbal, M.S. Tanweer and M. Alam, *ACS Omega*, 2023, **8**, 6376-6390.
- 9 M. Shabani, E. Saebnoori, S.A. Hassanzadeh-Tabrizi and H.R. Bakhsheshi-Rad, *J. Mater. Sci.: Mater. Electron.*, 2021, **32**, 10424-10442.
- 10 L.T.M. Thy, N.T.C. Linh, N.T.T. Tram, T.H. Tu, L.T. Tai, P.T. Khang, H.M. Nam, N.H. Hieu and M.T. Phong, *J. Nanomater.*, 2021, **2021**, 4636531.
- 11 M. Farahmandjou and F. Soflaee, *Phys. Chem. Res.*, 2015, **3**, 191-196.
- 12 S. Patar, R. Mittal, F. Yasmin, B.K. Bhuyan and L.J. Borthakur, *Chemosphere*, 2024, **363**, 142908.
- 13 A. Singh, F. Wan, K. Yadav, S. Kharbanda, P. Thakur and A. Thakur, *Mater. Sci. Eng. B*, 2024, **299**, 116935.

- 
- 14 W.M. Alamier, N. Hasan, M.S. Nawaz, K.S. Ismail, M. Shkir, M.A. Malik and M.D. Oteef, *J. Mater. Res. Technol.*, 2023, **22**, 1331-1348.
- 15 S.A. Hassanzadeh-Tabrizi, *J. Photochem. Photobiol., A*, 2021, **418**, 113398.
- 16 S. Munir, M.F. Warsi, S. Zulfiqar, I. Ayman, S. Haider, I.A. Alsafari, P.O. Agboola and I. Shakir, *J. Saudi Chem. Soc.*, 2021, **25**, 101388.
- 17 A. Makofane, P.J. Maake, M.M. Mathipa, N. Matinise, F.R. Cummings, D.E. Motaung and N.C. Hintsho-Mbita, *Inorg. Chem. Commun.*, 2022, **139**, 109348.
- 18 F.S. Arghavan, T.J. Al-Musawi, G.A. Rumman, R. Pelalak, A. Khataee and N. Nasseh, *J. Environ. Chem. Eng.*, 2021, **9**, 105619.
- 19 T.J. Al-Musawi, N. Mengelizadeh, M. Taghavi, Z. Shehu and D. Balarak, *Environ. Sci. Pollut. Res.*, 2022, **29**, 51703-51716.
- 20 S.S.M. Thaha, N. Pugazhenthiran, P. Sathishkumar, V.T. Perarasu, R. Kumaresan, M.A. Assiri and M. Selvaraj, *Ceram. Int.*, 2024.
- 21 A. Rahman, S. Zulfiqar, A.U. Haq, I.A. Alsafari, U.Y. Qazi, M.F. Warsi and M. Shahid, *Ceram. Int.*, 2021, **47**, 9513-9521.
